# Supplementary material for: Mental distress and perceived wealth, justice and freedom across eight countries: The invisible power of the macrosystem
Source: PubMed Central journal article supplement (PMC5931469; doi:10.1371/journal.pone.0194642), 2018-05-02
Supplement: pone.0194642.s001.pdf [file pone.0194642.s001.pdf]

**Project: 140403\_USA**

**Sprache:**

**englisch (USA)**

**Datum: 05.11.2014**

**INT01**

Good afternoon, my name is XX from USUMA GmbH, from an independent social research institute in Berlin.

We are doing a study about justice and well-being on behalf of Ruhr University Bochum. A representative selection of citizens age 18 and over will be asked, where individuals will be determined according to an exclusive selection principle. Your household was selected as well. In order to get a meaningful result, the participation of a person in your household is very important.

First I would like to identify the person with whom we want to fill in the questionnaire in your household.

First, I need a few details of the persons in your household.

The conversation would not take longer than 12 minutes.

In the context of our scientific study we are interested in different aspects of personal well-being in the population and your personal estimate, for example, of justice and freedom in USA.

Cordially, we would ask you to support us. The participation is, of course, free. There will be no disadvantages if you do not participate at the study or those will be cancelled in the process. Your participation, however, will support our research.

Do you agree upon to start with the questionnaire?

**SW1**

Would you be so kind to tell me how many people live in your household who are 18 years and older, yourself included?

==> /Q100MOBIL=01

\$E 1 9

**Choices**

refused

99

N

==>  
SELS

In which state do you live?

**Choices**

|                      |    |
|----------------------|----|
| Alabama              | 01 |
| Alaska               | 02 |
| Arizona              | 03 |
| Arkansas             | 04 |
| California           | 05 |
| Colorado             | 06 |
| Connecticut          | 07 |
| Delaware             | 08 |
| District of Columbia | 09 |
| Florida              | 10 |
| Georgia              | 11 |
| Hawaii               | 12 |
| Idaho                | 13 |
| Illinois             | 14 |
| Indiana              | 15 |
| Iowa                 | 16 |
| Kansas               | 17 |
| Kentucky             | 18 |
| Louisiana            | 19 |
| Maine                | 20 |
| Maryland             | 21 |
| Massachusetts        | 22 |
| Michigan             | 23 |
| Minnesota            | 24 |
| Mississippi          | 25 |
| Missouri             | 26 |
| Montana              | 27 |
| Nebraska             | 28 |
| Nevada               | 29 |
| New Hampshire        | 30 |
| New Jersey           | 31 |
| New Mexico           | 32 |
| New York             | 33 |
| North Carolina       | 34 |
| North Dakota         | 35 |
| Ohio                 | 36 |
| Oklahoma             | 37 |
| Oregon               | 38 |
| Pennsylvania         | 39 |
| Rhode Island         | 40 |
| South Carolina       | 41 |
| South Dakota         | 42 |
| Tennessee            | 43 |
| Texas                | 44 |
| Utah                 | 45 |
| Vermont              | 46 |
| Virginia             | 47 |
| Washington           | 48 |
| West Virginia        | 49 |
| Wisconsin            | 50 |
| Wyoming              | 51 |

**Q100**

INT.: Please enter without asking!

Code sex

**Choices**

|        |    |
|--------|----|
| male   | 01 |
| female | 02 |

**Q101**

Comment: Age only query directly when no age is still displayed.

Tell me first, how old are you?

\$E 18 99

**SA2A**

Reference: Please click on the month.

First, I have a few questions for statistical purposes.

Please tell me your birth month?

**Choices**

|           |    |
|-----------|----|
| January   | 01 |
| February  | 02 |
| March     | 03 |
| April     | 04 |
| May       | 05 |
| June      | 06 |
| July      | 07 |
| August    | 08 |
| September | 09 |
| October   | 10 |
| November  | 11 |
| December  | 12 |
| refused   | 99 |

**SA2B**

Please enter the 4-digit year. For example, 1961.

In what year were you born?

\$E 1900 1996

**Choices**

|         |    |
|---------|----|
| refused | KA |
|---------|----|

**SA3US**

comment: read out. Only one response.

Were you born in the US?

**Choices**

|         |    |
|---------|----|
| yes     | 01 |
| no      | 02 |
| refused | 99 |

In which state were you born?

### Choices

|                      |    |
|----------------------|----|
| Alabama              | 01 |
| Alaska               | 02 |
| Arizona              | 03 |
| Arkansas             | 04 |
| California           | 05 |
| Colorado             | 06 |
| Connecticut          | 07 |
| Delaware             | 08 |
| District of Columbia | 09 |
| Florida              | 10 |
| Georgia              | 11 |
| Hawaii               | 12 |
| Idaho                | 13 |
| Illinois             | 14 |
| Indiana              | 15 |
| Iowa                 | 16 |
| Kansas               | 17 |
| Kentucky             | 18 |
| Louisiana            | 19 |
| Maine                | 20 |
| Maryland             | 21 |
| Massachusetts        | 22 |
| Michigan             | 23 |
| Minnesota            | 24 |
| Mississippi          | 25 |
| Missouri             | 26 |
| Montana              | 27 |
| Nebraska             | 28 |
| Nevada               | 29 |
| New Hampshire        | 30 |
| New Jersey           | 31 |
| New Mexico           | 32 |
| New York             | 33 |
| North Carolina       | 34 |
| North Dakota         | 35 |
| Ohio                 | 36 |
| Oklahoma             | 37 |
| Oregon               | 38 |
| Pennsylvania         | 39 |
| Rhode Island         | 40 |
| South Carolina       | 41 |
| South Dakota         | 42 |
| Tennessee            | 43 |
| Texas                | 44 |
| Utah                 | 45 |
| Vermont              | 46 |
| Virginia             | 47 |
| Washington           | 48 |
| West Virginia        | 49 |
| Wisconsin            | 50 |
| Wyoming              | 51 |
| other country        | 52 |
| refused              | 99 |

## SA5

comment: read out. Only one response.

Are you citizen of the US?

## Choices

|         |    |
|---------|----|
| yes     | 01 |
| no      | 02 |
| refused | 99 |

## SA5A

Please specify your ethnicity.

## Choices

|                        |    |
|------------------------|----|
| Hispanic or Latino     | 01 |
| Not Hispanic or Latino | 02 |
| refused                | 99 |

## SA5B

Please specify your race.

## Choices

|                                           |    |   |
|-------------------------------------------|----|---|
| American Indian or Alaska Native          | 01 |   |
| Asian                                     | 02 |   |
| Black or African American                 | 03 |   |
| Native Hawaiian or Other Pacific Islander | 04 |   |
| White                                     | 05 |   |
|                                           | 06 |   |
| refused                                   | 99 | X |

## SA6

Comment: note answer.

What language do you speak most often at home?

## Choices

|                |    |   |
|----------------|----|---|
| arabic         | 01 |   |
| bulgarian      | 02 |   |
| chinese        | 03 |   |
| danish         | 04 |   |
| german         | 05 |   |
| english        | 06 |   |
| finnish        | 07 |   |
| french         | 08 |   |
| italian        | 09 |   |
| japanese       | 10 |   |
| korean         | 11 |   |
| kurdish        | 12 |   |
| dutch          | 13 |   |
| norwegian      | 14 |   |
| polish         | 15 |   |
| portuguese     | 16 |   |
| russian        | 17 |   |
| swedish        | 18 |   |
| spanish        | 19 |   |
| turkish        | 20 |   |
| Other, which ? | 21 | O |
| refused        | 99 |   |



Q1

Comment: Enter the number in the box below.

To help people say how good or bad a health state is, please use the same scale on which the best state you can imagine is marked 100 and the worst state you can imagine is marked 0.

We would like you to indicate on this scale how good or bad your own health state is today, in your opinion.

\$E 0 100

Choices

refused

KA

Q2

Comment: Enter the number in the box below.

How do you see yourself: are you generally a person who is fully prepared to take risks or do you try to avoid taking risks?

Please imagine a scale, where 0 means "not at all willing to take risks", 100 means "very willing to take risks", and the numbers in between mean intermediate degrees of willingness to take risks.

Please tell me the appropriate rating of willingness to take risks.

\$E 0 100

Choices

refused

KA

Q3

Comment: Enter the number in the box below.

This question deals with your appearance in comparison to other people.

How good or bad in your opinion is your appearance in comparison to the appearance of other people?

Please imagine a scale, where absolutely beautiful looking people are marked with "100" and absolutely ugly looking with "0".

Please tell me the appropriate rating of your appearance.

\$E 0 100

Choices

refused

KA

**Q4A**

Comment: In each case only one response.

Now we will talk about fairness, freedom, wealth and social connectedness.  
We are interested in knowing how you evaluate USA. Please answer following questions in the respective area.

*The first area is fairness.*

When you compare the USA with other countries, how fair do you find the USA?  
Please imagine a scale from 0 to 100. In the context this means ...

0 = not at all fair

100 = very fair

SE 0 100

**Choices**

|         |     |
|---------|-----|
| refused | 999 |
|---------|-----|

**Q5A**

When you compare yourself with other people in the USA, how fairly do you feel treated?

Please imagine a scale from 0 to 100. In the context this means ...

0 = not at all fair

100 = very fair

SE 0 100

**Choices**

|         |     |
|---------|-----|
| refused | 999 |
|---------|-----|

**Q6A**

Comment: In each case only one response.

*The second area is freedom.*

When you compare the USA with other countries, how free do you find the USA?

Please remain at the scale from 0 to 100. Now this means...

0 = not at all free

100 = very free

SE 0 100

**Choices**

|         |     |
|---------|-----|
| refused | 999 |
|---------|-----|

**Q7A**

When you compare yourself with other people in the USA, how free do you feel?

Please remain at the scale from 0 to 100. Now this means ...

0 = not at all free

100 = very free

SE 0 100

**Choices**

|         |     |
|---------|-----|
| refused | 999 |
|---------|-----|



**Q8A**

Comment: In each case only one response.

*The third area is wealth.*

When you compare the USA with other countries, how wealthy do you find the USA?

Please remain at the scale from 0 to 100. Now this means ...

0 = not at all wealthy and

100 = very wealthy.

\$E 0 100

**Choices**

refused

999

**Q9A**

When you compare yourself with other people in the USA, how wealthy do you feel?

Please remain on the scale from 0 to 100. Now this means ...

0 = not at all wealthy

100 = very wealthy

\$E 0 100

**Choices**

refused

999

**Q10A**

Comment: In each case only one response.

*The fourth area is the social connectedness of people with each other.*

When you compare the USA with other countries, how connected are the people with each other in your opinion?

Please imagine a scale from 0 to 100. In the context this means ...

0 = not at all connected and

100 = very connected.

\$E 0 100

**Choices**

refused

999

**Q11A**

When you compare yourself with other people in the USA, how connected do you feel with other people?

Please imagine a scale from 0 to 100. In the context this means ...

0 = not at all connected and

100 = very connected.

\$E 0 100

**Choices**

refused

999

Comment: Only one response. Please read the scale and the key points of the scale regularly.

*Let's deal now with stress and burden:*

Please tell me at each statement how much these apply to you during the last week. There are no right or wrong answers. Please try to decide spontaneously for an answer.

The scale, which is available to you, reaches from 0 to 3. In the context this means...

0 = never: did not apply to me at all

1 = sometimes: applied to me to some degree, or some of the time

2 = often: applied to me to considerable degree, or a good part of time.

3 = almost always: applied to me very much, or most of the time.

|                                                                                                                                        | 0 = never: did not apply to me at all | 1 = sometimes: applied to me to some degree, or some of the time | 2 = often: applied to me to considerable degree, or a good part of time. | 3 = almost always: applied to me very much, or most of the time. | refused                  |
|----------------------------------------------------------------------------------------------------------------------------------------|---------------------------------------|------------------------------------------------------------------|--------------------------------------------------------------------------|------------------------------------------------------------------|--------------------------|
| I found it hard to wind down.                                                                                                          | <input type="checkbox"/>              | <input type="checkbox"/>                                         | <input type="checkbox"/>                                                 | <input type="checkbox"/>                                         | <input type="checkbox"/> |
| I was aware of dryness of my mouth.                                                                                                    | <input type="checkbox"/>              | <input type="checkbox"/>                                         | <input type="checkbox"/>                                                 | <input type="checkbox"/>                                         | <input type="checkbox"/> |
| I couldn't seem to experience any positive feeling at all.                                                                             | <input type="checkbox"/>              | <input type="checkbox"/>                                         | <input type="checkbox"/>                                                 | <input type="checkbox"/>                                         | <input type="checkbox"/> |
| I experienced breathing difficulty (e.g., excessively rapid breathing, breathlessness in the absence of physical exertion).            | <input type="checkbox"/>              | <input type="checkbox"/>                                         | <input type="checkbox"/>                                                 | <input type="checkbox"/>                                         | <input type="checkbox"/> |
| I found it difficult to work up the initiative to do things.                                                                           | <input type="checkbox"/>              | <input type="checkbox"/>                                         | <input type="checkbox"/>                                                 | <input type="checkbox"/>                                         | <input type="checkbox"/> |
| I tended to over-react to situations.                                                                                                  | <input type="checkbox"/>              | <input type="checkbox"/>                                         | <input type="checkbox"/>                                                 | <input type="checkbox"/>                                         | <input type="checkbox"/> |
| I experienced trembling(e.g., in the hands).                                                                                           | <input type="checkbox"/>              | <input type="checkbox"/>                                         | <input type="checkbox"/>                                                 | <input type="checkbox"/>                                         | <input type="checkbox"/> |
| I found it difficult to relax.                                                                                                         | <input type="checkbox"/>              | <input type="checkbox"/>                                         | <input type="checkbox"/>                                                 | <input type="checkbox"/>                                         | <input type="checkbox"/> |
| I was worried about situations in which I might panic and make a fool of myself.                                                       | <input type="checkbox"/>              | <input type="checkbox"/>                                         | <input type="checkbox"/>                                                 | <input type="checkbox"/>                                         | <input type="checkbox"/> |
| I felt that I had nothing to look forward to.                                                                                          | <input type="checkbox"/>              | <input type="checkbox"/>                                         | <input type="checkbox"/>                                                 | <input type="checkbox"/>                                         | <input type="checkbox"/> |
| I found myself getting agitated.                                                                                                       | <input type="checkbox"/>              | <input type="checkbox"/>                                         | <input type="checkbox"/>                                                 | <input type="checkbox"/>                                         | <input type="checkbox"/> |
| I felt that I was using a lot of nervous energy.                                                                                       | <input type="checkbox"/>              | <input type="checkbox"/>                                         | <input type="checkbox"/>                                                 | <input type="checkbox"/>                                         | <input type="checkbox"/> |
| I felt down-hearted and blue.                                                                                                          | <input type="checkbox"/>              | <input type="checkbox"/>                                         | <input type="checkbox"/>                                                 | <input type="checkbox"/>                                         | <input type="checkbox"/> |
| I was intolerant of anything that kept me from getting on with what I was doing.                                                       | <input type="checkbox"/>              | <input type="checkbox"/>                                         | <input type="checkbox"/>                                                 | <input type="checkbox"/>                                         | <input type="checkbox"/> |
| I felt I was close to panic.                                                                                                           | <input type="checkbox"/>              | <input type="checkbox"/>                                         | <input type="checkbox"/>                                                 | <input type="checkbox"/>                                         | <input type="checkbox"/> |
| I was unable to become enthusiastic about anything.                                                                                    | <input type="checkbox"/>              | <input type="checkbox"/>                                         | <input type="checkbox"/>                                                 | <input type="checkbox"/>                                         | <input type="checkbox"/> |
| I felt I wasn't worth much as a person.                                                                                                | <input type="checkbox"/>              | <input type="checkbox"/>                                         | <input type="checkbox"/>                                                 | <input type="checkbox"/>                                         | <input type="checkbox"/> |
| I felt that I was rather touchy.                                                                                                       | <input type="checkbox"/>              | <input type="checkbox"/>                                         | <input type="checkbox"/>                                                 | <input type="checkbox"/>                                         | <input type="checkbox"/> |
| I was aware of the action of my heart in the absence of physical exertion. (e.g., sense of heart rate increase, heart missing a beat). | <input type="checkbox"/>              | <input type="checkbox"/>                                         | <input type="checkbox"/>                                                 | <input type="checkbox"/>                                         | <input type="checkbox"/> |
| I felt scared without any good reason.                                                                                                 | <input type="checkbox"/>              | <input type="checkbox"/>                                         | <input type="checkbox"/>                                                 | <input type="checkbox"/>                                         | <input type="checkbox"/> |
| I felt that life was meaningless.                                                                                                      | <input type="checkbox"/>              | <input type="checkbox"/>                                         | <input type="checkbox"/>                                                 | <input type="checkbox"/>                                         | <input type="checkbox"/> |

## Statistik 2. Teil

**SB1UK**

comment: read out. Only one response.

You were born in ...

### Choices

|                                        |    |
|----------------------------------------|----|
| A big city                             | 01 |
| The suburbs or outskirts of a big city | 02 |
| A town or a small city                 | 03 |
| A country village                      | 04 |
| A farm or home in the countryside      | 05 |
| refused                                | 99 |

**SB2UK**

comment: read out. Only one response.

Which phrase describes best the area where you live?

### Choices

|                                        |    |
|----------------------------------------|----|
| A big city                             | 01 |
| The suburbs or outskirts of a big city | 02 |
| A town or a small city                 | 03 |
| A country village                      | 04 |
| A farm or home in the countryside      | 05 |
| refused                                | 99 |

**SB3US**

What is your marital status?

### Choices

|               |    |
|---------------|----|
| Now married   | 01 |
| Widowed       | 02 |
| Divorced      | 03 |
| Separated     | 04 |
| Never married | 05 |
| refused       | 99 |

**SB4**

comment: read out. Only one response.

Do you have children?

### Choices

|                           |    |
|---------------------------|----|
| No                        | 01 |
| Yes, 1 child              | 02 |
| Yes, 2 children           | 03 |
| Yes, 3 children           | 04 |
| Yes, more than 3 children | 05 |
| refused                   | 99 |

**TEXT1**

==> \*IF((SB4=01),01,02)

**Choices**

|                                                           |    |
|-----------------------------------------------------------|----|
| Do you want to have a child/children in the future?       | 01 |
| Do you want to have a child/ more children in the future? | 02 |

**SB5**

comment: Only one response.

<TEXT1>

==> /+1(Q100==2 AND Q101>45) OR (Q100==1 AND Q101>60)

**Choices**

|         |    |
|---------|----|
| Yes     | 01 |
| No      | 02 |
| refused | 99 |

**SB6**

Comment: Enter the number below.

Including yourself, how many people - including children - live here regularly as members of this household?

\$E 1 15

**Choices**

|         |    |   |
|---------|----|---|
| refused | 99 | N |
|---------|----|---|

**SB7A**

\$R.1 0.5 110

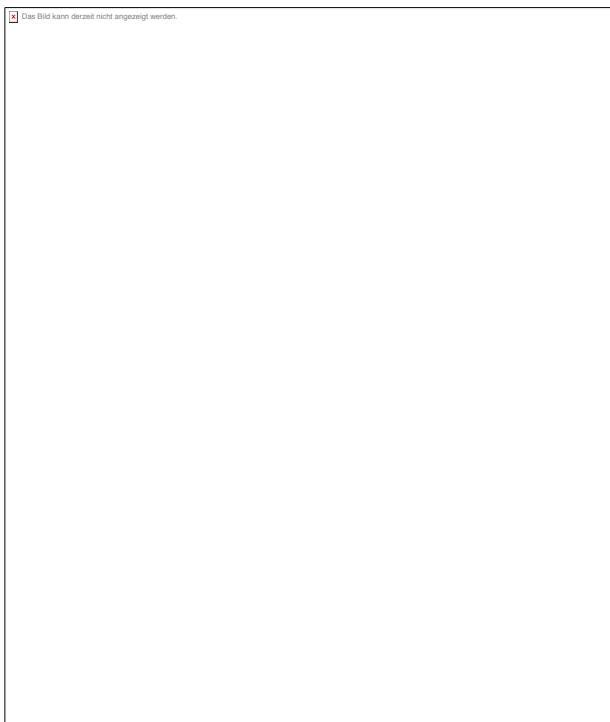



comment: read out. Only one response.

To which group do you belong ?

### Choices

|                                                                                                |    |
|------------------------------------------------------------------------------------------------|----|
| A one-person household                                                                         | 01 |
| More-people household                                                                          | 02 |
| Single parent with children younger than 25 years                                              | 03 |
| Parents with children younger than 25 years                                                    | 04 |
| Parents or single parent with children younger than 25 years or other people in the household. | 05 |
| Other household                                                                                | 06 |
| refused                                                                                        | 99 |

Comment: Specified in Dollar. Enter in the box below Please .

Please tell me your household's total income, after tax and compulsory deductions, from all sources?

If you don't know the exact figure, please give an estimate.

Use what you know best: weekly, monthly or annual income.

### Choices

|                        |    |
|------------------------|----|
| Less than \$10,000     | 01 |
| \$10,000 to \$19,999   | 02 |
| \$20,000 to \$29,999   | 03 |
| \$30,000 to \$39,999   | 04 |
| \$40,000 to \$49,999   | 05 |
| \$50,000 to \$59,999   | 06 |
| \$60,000 to \$69,999   | 07 |
| \$70,000 to \$79,999   | 08 |
| \$80,000 to \$89,999   | 09 |
| \$90,000 to \$99,999   | 10 |
| \$100,000 to \$149,999 | 11 |
| \$150,000 or more      | 12 |
| refused                | 99 |

**SB10UK**

comment: read out. Only one response.

Which of these descriptions applies to what you have been doing for the last 7 days?

**Choices**

|                                                                                                |    |
|------------------------------------------------------------------------------------------------|----|
| in paid work (or away temporarily) (employee, self-employed, working for your family business) | 01 |
| in education, (not paid for by employer) even if on vacation                                   | 02 |
| unemployed and actively looking for a job                                                      | 03 |
| unemployed, wanting a job but not actively looking for a job                                   | 04 |
| permanently sick or disabled                                                                   | 05 |
| retired                                                                                        | 06 |
| doing housework, looking after children or other persons                                       | 07 |
| other                                                                                          | 08 |
| refused                                                                                        | 99 |

**SB10AUS**

Are you currently...?

**Choices**

|                                                |    |
|------------------------------------------------|----|
| Employed for wages                             | 01 |
| Self-employed                                  | 02 |
| Out of work and looking for work               | 03 |
| Out of work but not currently looking for work | 04 |
| A homemaker                                    | 05 |
| A student                                      | 06 |
| Retired                                        | 07 |
| Unable to work                                 | 08 |
| refused                                        | 99 |

**SB10BUS**

Please describe your work.

==> +1NOT SB10AUS=01,02,05

**Choices**

|                                                                                                     |    |
|-----------------------------------------------------------------------------------------------------|----|
| Employee of a for-profit company or business or of an individual, for wages, salary, or commissions | 01 |
| Employee of a not-for-profit, tax-exempt, or charitable organization                                | 02 |
| Local government employee (city, county, etc.)                                                      | 03 |
| State government employee                                                                           | 04 |
| Federal government employee                                                                         | 05 |
| Self-employed in own not-incorporated business, professional practice, or farm                      | 06 |
| Self-employed in own incorporated business, professional practice, or farm                          | 07 |
| Working without pay in family business or farm                                                      | 08 |
| refused                                                                                             | 99 |

**SB11**

comment: read out. Only one response.

In your main job are/were you

==> +1NOT SB10UK=01

**Choices**

|                                            |    |
|--------------------------------------------|----|
| an employee                                | 01 |
| self-employed                              | 02 |
| or, wokring for your own family's business | 03 |
| refused                                    | 99 |

**SB11AUK**

Do you have a work contract of ...

==> +1NOT (NATIO=001 AND SB10UK=01,02)

**Choices**

|                              |    |
|------------------------------|----|
| unlimited duration           | 01 |
| limited duration             | 02 |
| or, do you have no contract? | 03 |
| refused                      | 99 |

**SB13US**

comment: read out. Only one response.

What is the highest degree or level of school you have completed?

**Choices**

|                                                                                     |    |   |
|-------------------------------------------------------------------------------------|----|---|
| No schooling completed                                                              | 00 |   |
| Nursery school                                                                      | 01 |   |
| Kindergarten                                                                        | 02 |   |
| Grade 1 through 11, specify grade                                                   | 03 | O |
| 12th grade - NO DIPLOMA                                                             | 04 |   |
| Regular high school diploma                                                         | 05 |   |
| GED or alternative credential                                                       | 06 |   |
| Some college credit, but less than 1 year if college credit                         | 07 |   |
| 1 or more years of college credit, no degree                                        | 08 |   |
| Associate's degree (for example AA, AS)                                             | 09 |   |
| Bachelor's degree (for example: BA, BS)                                             | 10 |   |
| Master's degree (for example: MA, MS, Meng, MEDd, MSW, MBA)                         | 11 |   |
| Professional degree beyond a bachelor's degree (for example: MD, DDS, DVM, LLB, JD) | 12 |   |
| Doctorate degree (for example PhD, EdD)                                             | 13 |   |
| refused                                                                             | 99 |   |





Darstellung als Schirm

| SB14UK                            |
|-----------------------------------|
| Comment: Specified in inch, feet. |
| feet                              |
| \$E 0 10                          |

| SB14AUK  |
|----------|
| inch     |
| \$E 0 11 |

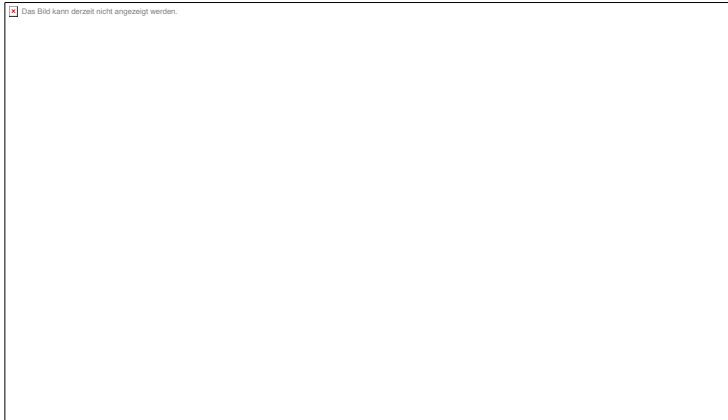

| SB15US                           |    |
|----------------------------------|----|
| Comment: Specified in lbs.       |    |
| Please tell me your body weight: |    |
| \$E 50 400                       |    |
| <b>Choices</b>                   |    |
| refused                          | KA |

| SHM1                                                                                                                               |    |            |
|------------------------------------------------------------------------------------------------------------------------------------|----|------------|
| Do you use the cellular phone which I just called, exclusively only, do you share it with others or do you just use it by chance ? |    |            |
| ==> /+3NOT MOBIL=01                                                                                                                |    |            |
| <b>Choices</b>                                                                                                                     |    |            |
| use cell phone alone                                                                                                               | 01 | ==><br>/+3 |
| share it with others                                                                                                               | 02 |            |
| use it just by chance                                                                                                              | 98 | ==><br>/+3 |
| refused                                                                                                                            | 99 | ==><br>/+3 |

**SHM1A**

How many people from 14 years are there ?

Comment: Personal number without the questioning person.

==> /+1NOT SHM1=02

\$E 1 20

**Choices**

|            |    |
|------------|----|
| no further | 00 |
| refused    | 99 |

**SHM2**

Do you have at home a landline phone?

This means a phone by which you are accessible under your local prefix ?

**Choices**

|         |    |
|---------|----|
| yes     | 01 |
| no      | 02 |
| refused | 99 |

**SHM3**

About how many cellular phone numbers are you currently personally accessible by phone, in other words you use it to call, no matter whether professionally or private ?

**Choices**

|                      |    |
|----------------------|----|
| no (online landline) | 00 |
| one                  | 01 |
| two                  | 02 |
| three                | 03 |
| four                 | 04 |
| five                 | 05 |
| refused              | 99 |

**SHM4**

Let's get to your landline phone.

About how many different landline phone numbers with your prefix are you accessible at home ?

Thus we mean no calling numbers which exclusively belong to a fax machine or computer.

**Choices**

|                    |    |
|--------------------|----|
| no (online mobile) | 00 |
| one                | 01 |
| two                | 02 |
| three              | 03 |
| four               | 04 |
| five               | 05 |
| d.k. / refused     | 99 |

**INT98**

Sorry but you don't belong to our target group.  
Thank you very much for your time! Good bye!

**Choices**

|                    |    |   |             |
|--------------------|----|---|-------------|
| Screeninginterview | SC | D | ==><br>/END |
|--------------------|----|---|-------------|

**INT99**

Thank you very much for the interview!

**Choices**

|                     |    |   |  |
|---------------------|----|---|--|
| Interview completet | VO | D |  |
|---------------------|----|---|--|

**BYEND**

I wish you a nice day. Goodbye!

**Choices**

|                     |    |   |              |
|---------------------|----|---|--------------|
| Interview completet | 01 | D | ==><br>/QSEX |
|---------------------|----|---|--------------|

**Stichprobenmerkmale****NATIO**

==> /+11>0

**Choices**

|             |     |
|-------------|-----|
| Deutschland | 049 |
| England     | 044 |
| Frankreich  | 033 |
| Spanien     | 034 |
| Polen       | 048 |
| Schweden    | 046 |
| Russland    | 007 |
| USA         | 001 |

**MOBIL****Choices**

|          |    |
|----------|----|
| Festnetz | 00 |
| Handy    | 01 |
